# Supplementary material for: Covalently conjugated transforming growth factor-β1 in modular chitosan hydrogels for the effective treatment of articular cartilage defects
Source: Royal Society of Chemistry journal article supplement (doi:10.1039/c4bm00431k), 2015-01-01
Supplement: c4bm00431k1.pdf [file c4bm00431k1.pdf]

## Electronic Supplementary Information (ESI)

### **Covalently conjugated transforming growth factor- $\beta$ 1 in modular chitosan hydrogels for the effective treatment of articular cartilage defects†**

Bogyu Choi<sup>a</sup>, Soyon Kim<sup>b</sup>, Jiabing Fan<sup>a</sup>, Tomasz Kowalski<sup>c</sup>, Frank Petrigliano<sup>c</sup>, Denis Evseenko<sup>c</sup> and Min Lee<sup>\*a, b</sup>

*<sup>a</sup>Division of Advanced Prosthodontics, University of California, Los Angeles, CA 90095, USA.*

*E-mail: leemin@ucla.edu*

*<sup>b</sup>Department of Bioengineering, University of California, Los Angeles, CA 90095, USA*

*<sup>c</sup>Department of Orthopaedic Surgery, University of California, Los Angeles, CA 90095, USA*

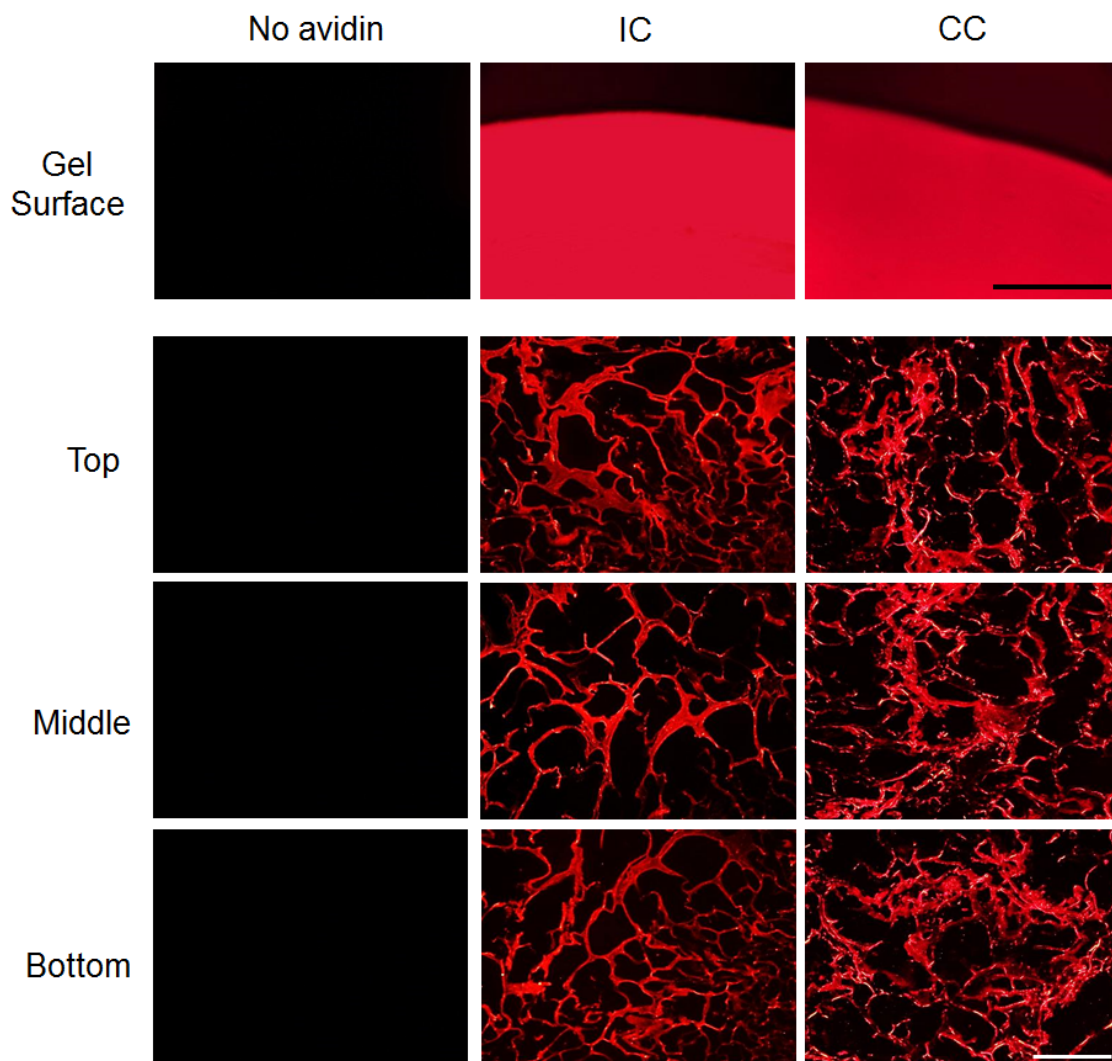

**Fig. S1.** Fluorescent microscopic images of MeGC/Col II hydrogels loaded with Texas Red<sup>®</sup> conjugated avidin (gel surface). Fluorescent observation was also performed on the thin cryo-sections (20  $\mu\text{m}$ ) collected from the top, middle, and bottom of disk-shaped hydrogels (diameter = 5 mm, height = 2 mm). Scale bars are 500  $\mu\text{m}$ .

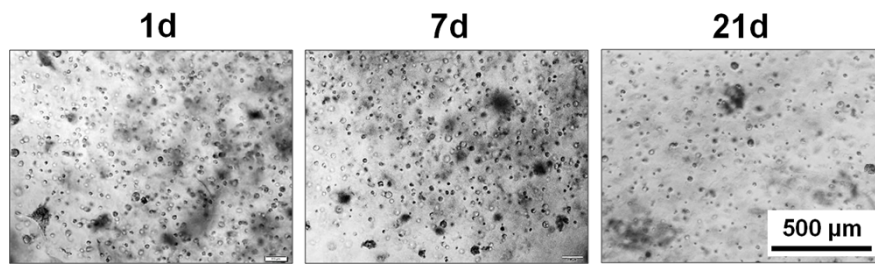

**Fig. S2.** Bright field images of ADSCs encapsulated in MeGC/Col II hydrogels in CM without TGF- $\beta$ 1 during 21 days.

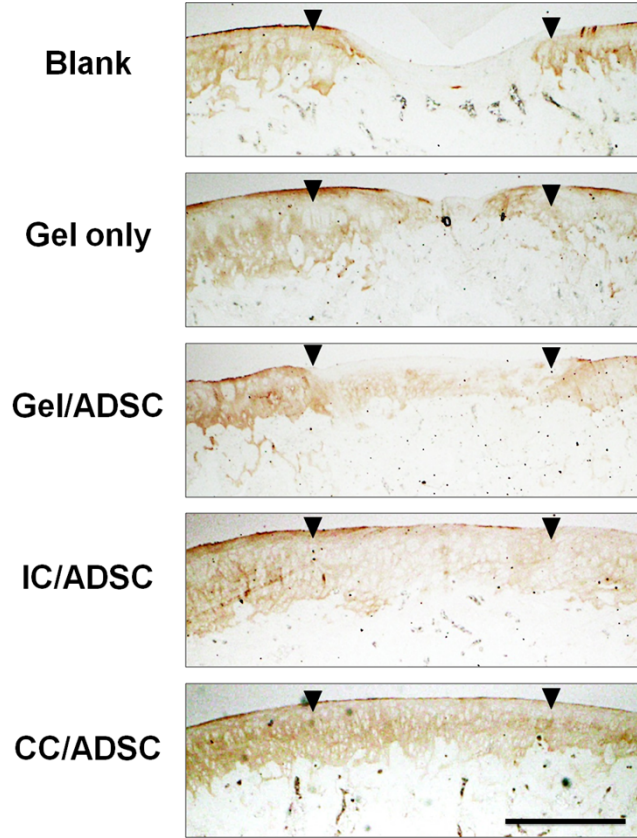

**Fig. S3.** Repair of cartilage defects *in vivo*. Histological analysis of accumulated Col II from ADSCs in hydrogels by immunohistochemistry at 8 weeks. Scale bar is 500  $\mu$ m.

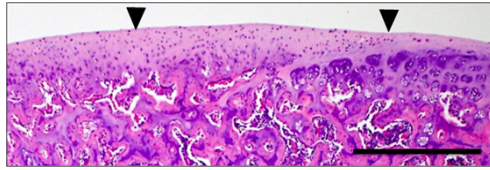

**Fig. S4.** H&E staining for the defect treated with TGF- $\beta$ 1 only without ADSCs. Scale bar is 500  $\mu$ m.
